# Supplementary material for: Rubbery stretchable conductors based on 3D printed silver nanowires and their application in wearable optoelectronic devices
Source: Royal Society of Chemistry journal article supplement (doi:10.1039/d4tc00720d), 2024-01-01
Supplement: d4tc00720d1.pdf [file d4tc00720d1.pdf]

Supporting Information for

## **Rubbery stretchable conductors based on 3D printed silver nanowire and their application in wearable optoelectronic devices**

Xingliang Xu<sup>‡</sup>, Yu-Dong Zhao<sup>‡</sup>, Junmei Hu, Wei-Chen Gao, Jing Qiao, Xuanbo Chen, Ying-Shi Guan\*, Hong Yang\*, and Quan Li\*

Institute of Advanced Materials and School of Chemistry and Chemical Engineering, Southeast University, Nanjing 211189, P. R. China

\*Corresponding Authors: Ying-Shi Guan, [gyshi412@seu.edu.cn](mailto:gyshi412@seu.edu.cn); Hong Yang, [yangh@seu.edu.cn](mailto:yangh@seu.edu.cn);  
Quan Li, [quanli3273@gmail.com](mailto:quanli3273@gmail.com)

<sup>‡</sup> Xingliang Xu and Yu-Dong Zhao contributed equally to this work.

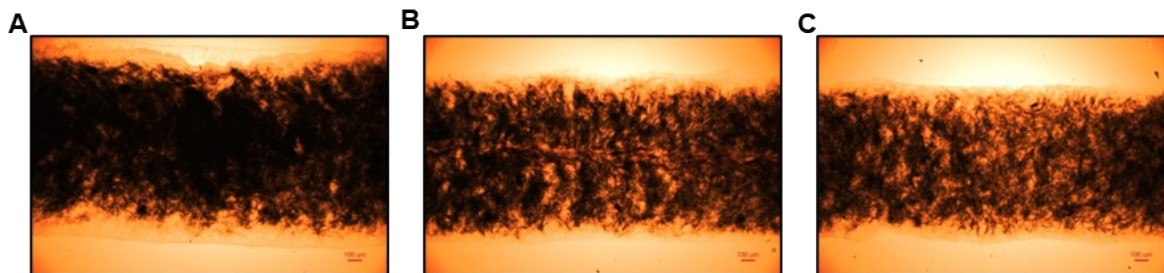

**Figure S1.** Optical image of the printed lines from pure AgNWs dispersion at different speed. (A) 1 mm/s (B) 3 mm/s (C) 5 mm/s.

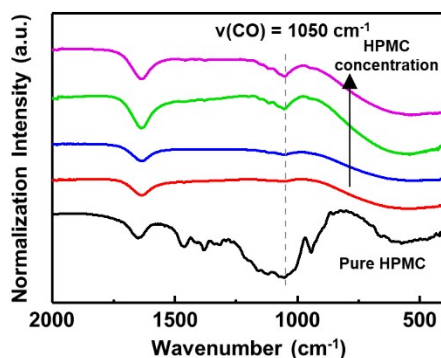

**Figure S2.** FTIR spectra of AgNWs ink with different HPMC concentrations. The HPMC concentrations are 40 mg/mL, 80 mg/mL, 120 mg/mL, 160 mg/mL respectively along the direction of the arrow.

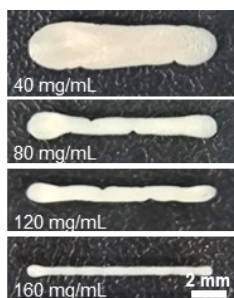

**Figure S3.** Photographs of the printed lines from AgNWs inks with different concentrations of HPMC.

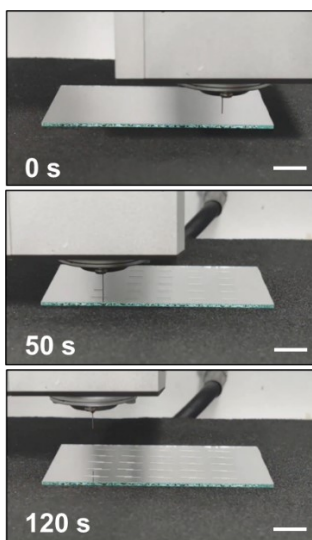

**Figure S4.** The print process of AgNWs electrode on the glass substrate (scale bar: 1 cm).

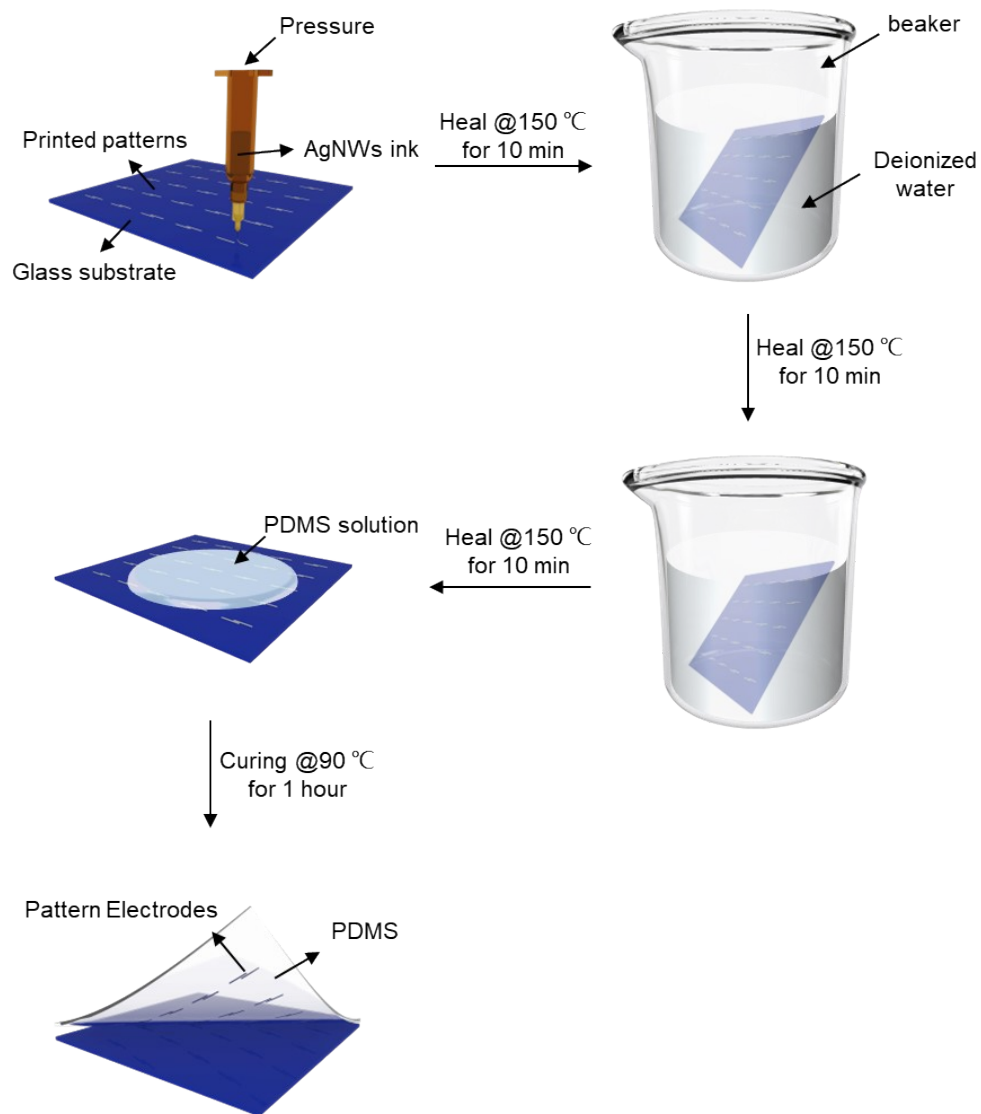

**Figure S5.** The fabrication process of the printed rubbery electrodes.

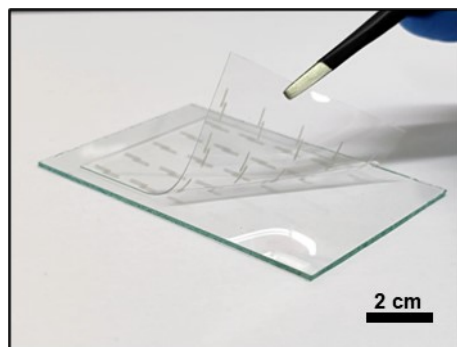

**Figure S6.** Photograph of the fabricated rubbery electrode array.

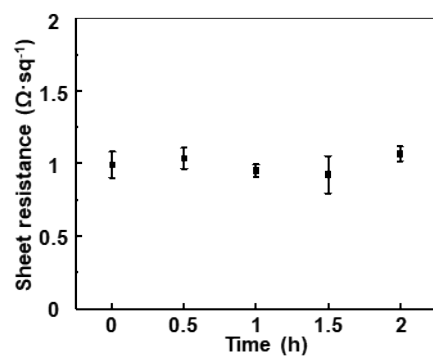

**Figure S7.** The sheet resistance of electrodes as a function of washing time.

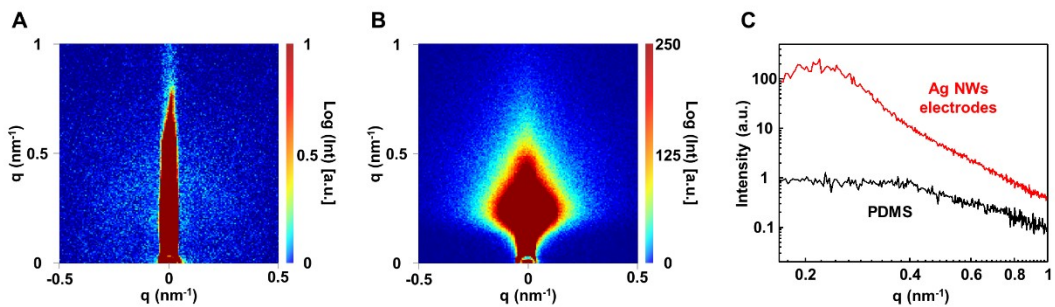

**Figure S8.** 2D GISAXS data (A) PDMS substrate and (B) AgNWs electrodes at an incident angle of  $0.4^\circ$ . (C) The calculated 1D data of both.

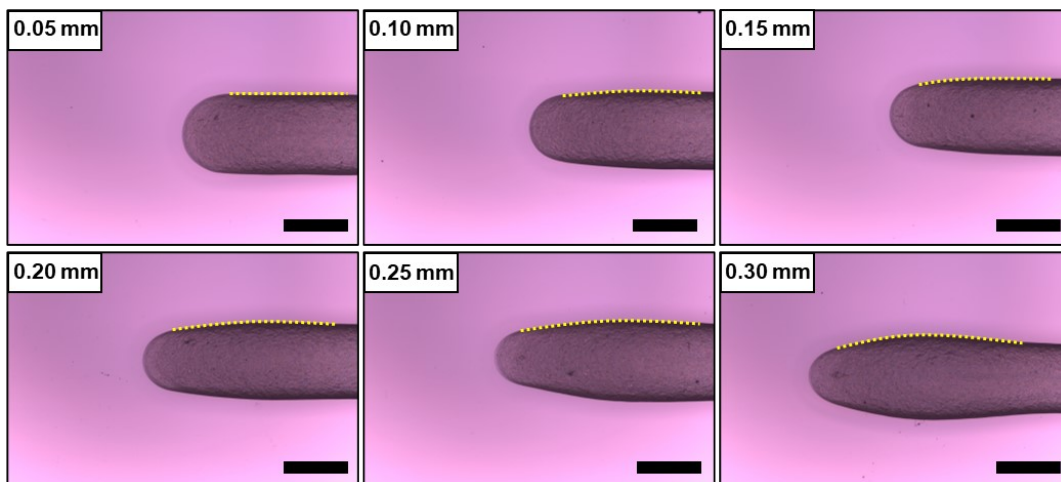

**Figure S9.** The evolution of boundary curves with different print gap as the yellow dotted line described. Scale bar:  $500\ \mu\text{m}$ .

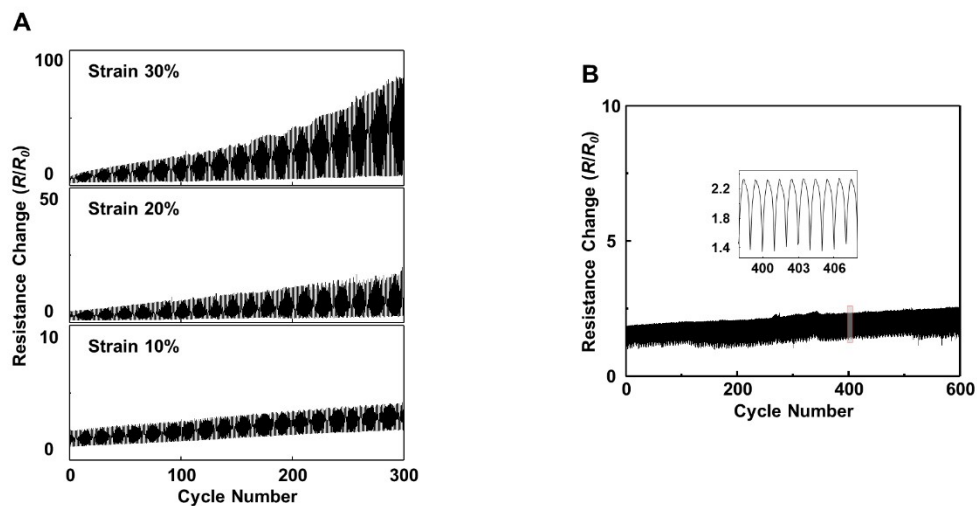

**Figure S10.** The fatigue test of electrodes. (A) cyclic stretching and releasing test at different strain (10%, 20% and 30%). (B) cyclic bending (bending curvature radius of the electrode is about 1 mm).

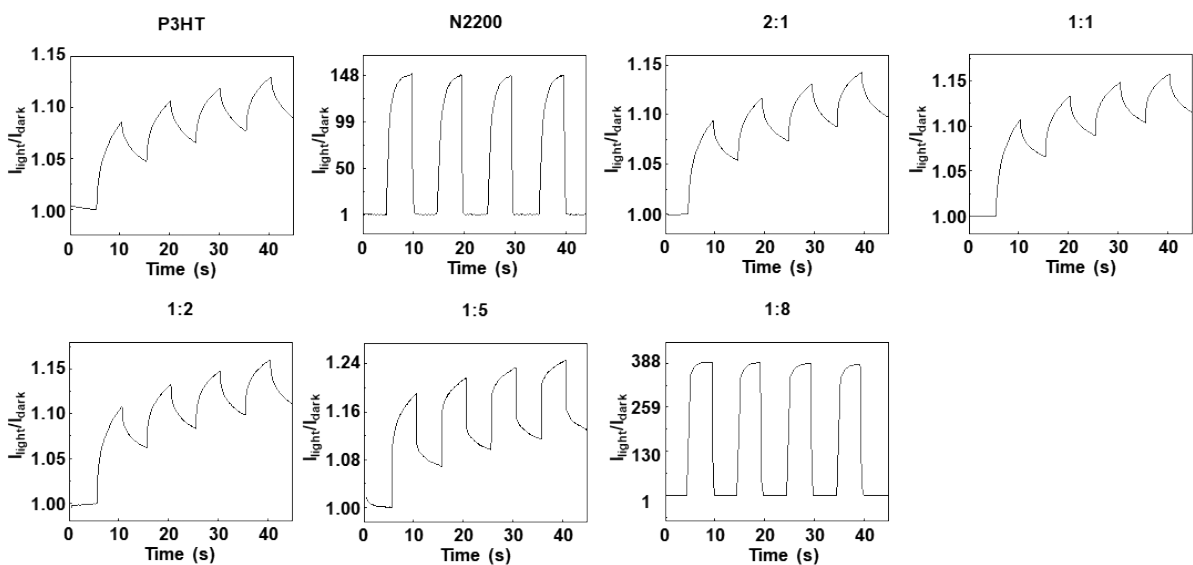

**Figure S11.** Time-dependent photo response of photodetectors based on different ratios of P3HT and N2200 as the active layers.

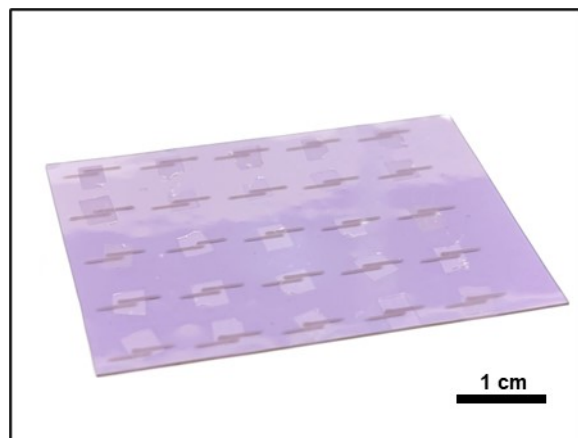

**Figure S12.** Photograph of the wearable transistor array based on the fabricated rubbery electrodes.

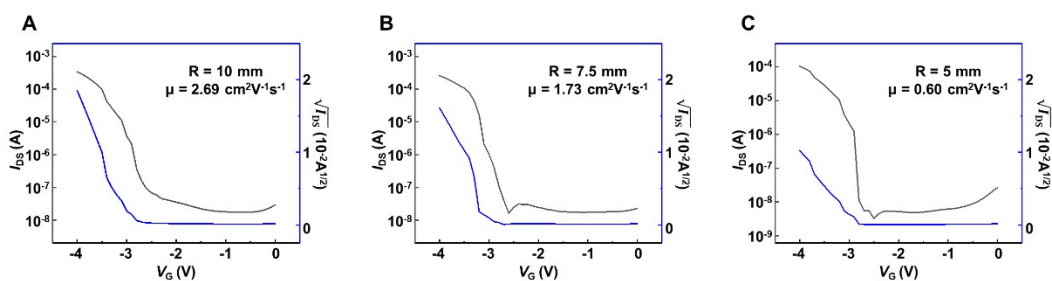

**Figure S13.** The transfer curves of wearable transistor under different bending radii. (A)  $R = 10$  mm (B)  $R = 7.5$  mm (C)  $R = 5$  mm.
